# Supplementary material for: Integration of linear and dendritic actin nucleation in Nck-induced actin comets
Source: PubMed Central journal article supplement — Mol Biol Cell. 2016 Jan 15;27(2):247–59. doi: 10.1091/mbc.E14-11-1555 (PMC4713129; doi:10.1091/mbc.e14-11-1555), 2016-01-15

# Supplemental Materials

*Molecular Biology of the Cell*

Borinskaya et al.

**Figure S1. CD16/7-mCherry-VCA and CD16/7 (Empty) fusion protein expression and co-expression in NIH-3T3 transfected cells.**

A Western blot demonstrating expression (anti-CD16) of CD16/7-mCherry-VCA (black arrow) and CD16/7 (empty arrow): 100% VCA, 100% Empty, 60% VCA with 40% Empty, 37% VCA with 63% Empty, 15% VCA with 85% Empty. A double band is observed for each CD16/7 fusion protein: the top band is the full-length fusion protein; the bottom band is a cleaved fusion protein lacking the aggregatable CD16 domain.

**Figure S2. VCA turnover via SynZip binding interface in membrane clusters.**

A. (Left) Fluorescent recovery after photobleaching (FRAP) of mCherry-VCA in CD16/7-eYFP-SynZip1 : SynZip2-mCherry-VCA clusters as compared to (Right) FRAP of mCherry-VCA in CD16/7-mCherry-VCA clusters. x-axis: time, seconds. y-axis: average integrated intensity of N-WASP or VCA cluster, normalized.

B. Western Blot of CD16/7-eYFP-SynZip1 (detected with anti-GFP antibody) and SynZip2-mCherry-VCA (detected with anti-dsRed antibody) expression in NIH3T3 cells. Lane (1) - wild type cells; lane (2) - cells expressing CD16/7-eYFP-SynZip1; lane (3) - cells expressing SynZip2-mCherry-VCA; lane (4) - cells co-expressing CD16/7-eYFP-SynZip1 and SynZip2-mCherry-VCA. Positions of molecular weight markers (MWM) are indicated to left.

C. Recruitment and clustering of SynZip2-mCherry-VCA after antibody-mediated aggregation of CD16/7-eYFP-SynZip1 (*top panel*). Without aggregating CD16/7-eYFP-SynZip1, SynZip2-mCherry-VCA does not cluster (*bottom panel*). Scale bars=10 $\mu$ m.

**Figure S3. Nck SH3(1-2-3) recruits the adaptor protein Dip by GST pull-down assay.**

293T cells were transfected with plasmids expressing YFP-DIP or mVen-mDia1. Whole cell lysates (WCL) of transfected cells were incubated with either GST or GST-Nck SH3(1-2-3) purified proteins immobilized on GSH beads. WCL or elution fractions from the beads were immunoblotted with anti-GFP antibody to detect YFP-DIP and mVen-mDia1 and with anti-GST antibody to detect GST and GST-Nck SH3(1-2-3) proteins bound to the GSH beads.

**Figure S4. Formin FH2 domain inhibition disrupts comet tail shape of Vaccinia-induced actin structures.**

A. Vaccinia-induced actin comets in fixed HeLa cells. Staining: actin (Phalloidin /red), Vaccinia (immunostaining, CFP/shown in green). *Top panel*: control cell (DMSO). *Bottom panel*: cell treated with the 100 $\mu$ M formin inhibitor SMIFH2.

B. Morphology analysis of Vaccinia-induced actin aggregates in DMSO-treated (control) and in SMIFH2-treated fixed HeLa cells. (*DMSO-treated*: 3 cells, 282 aggregates; *SMIFH2-treated*: 4 cells, 136 aggregates). Error bars are mean  $\pm$  s.e.m. \**P*<0.005.

**Figure S5. Formin FH1 domain overexpression for inhibition of endogenous formin activity at membrane clusters (Fig. 5).**

A Western blot demonstrating overexpression of mVenus tagged FH1 domain (anti-GFP) as compared to endogenous level of FH1 domain. *WT*: not transfected NIH-3T3 cells.

*Ctrl*: cells transfected with CD16/7-mCherry-Nck SH3 and mTFP1-actin. *Ven-mDia1*: cells transfected with CD16/7-mCherry-Nck SH3, mTFP1-actin and mVenus tagged full-length mDia1 (detected with anti-GFP and anti-mDia1). *Ven-FH1* (5 lanes): cells transfected with CD16/7-mCherry-Nck SH3, mTFP1-actin and mVenus tagged FH1 domain (detected with anti-GFP); *Ven-FH1* cell lysate was diluted 1/25, 1/50, 1/100, 1/200, 1/400 times. Loading control: cortactin.

**Figure S6. Comparison of actin structures induced by membrane clustering of Nck SH3 and N-WASP VCA with EPEC actin pedestals.**

**A.** Schematic of signaling cascade to branched actin nucleation in cells infected with *Vaccinia* virus. Not shown in the schematic is that N-WASP recruitment requires WIP, and that A36 also recruits Grb2, which enhances comet tail formation.

**B.** *Vaccinia*-induced actin comets in HeLa cells. Staining: actin (pseudo colored green/Phalloidin), *Vaccinia* (pseudo colored red/vB5R-GFP virus).

**C.** Schematic of signaling cascade to branched actin nucleation in cells infected with EPEC bacteria.

**D.** Infection of 3T3 cells with EPEC results in formation of actin pedestals. Staining: actin is stained with phalloidin 488 (green) and EPEC is labeled with mouse anti-LPS and alexa 568 anti-mouse secondary (red). Scale bars=5 $\mu$ m.

**E.** Morphology comparison of Nck- and VCA-induced actin structures, *Vaccinia* actin comet tails and EPEC actin pedestals. (*Nck*: 3 cells, 540 aggregates; *VCA*: 3 cells, 336 aggregates; *Vaccinia*: 9 cells, 371 aggregates; *EPEC*: 16 cells, 477 aggregates). Error bars are mean  $\pm$  s.e.m. \* $P < 0.01$ , \*\* $P < 0.001$ .

**F.** Velocity comparison of Nck- and VCA-induced actin structures, *Vaccinia* actin comet tails and EPEC actin pedestals. (*Nck*: 7 cells, 654 aggregates; *VCA*: 7 cells, 945 aggregates; *Vaccinia*: 7 cells, 125 aggregates; *EPEC*: 13 cells, 405 aggregates.)

# Figure S1

|                    |      |      |      |      |      |
|--------------------|------|------|------|------|------|
| CD16/7-mCherry-VCA | 1.00 | 0.00 | 0.60 | 0.37 | 0.15 |
| CD16/7 (Empty)     | 0.00 | 1.00 | 0.40 | 0.63 | 0.85 |

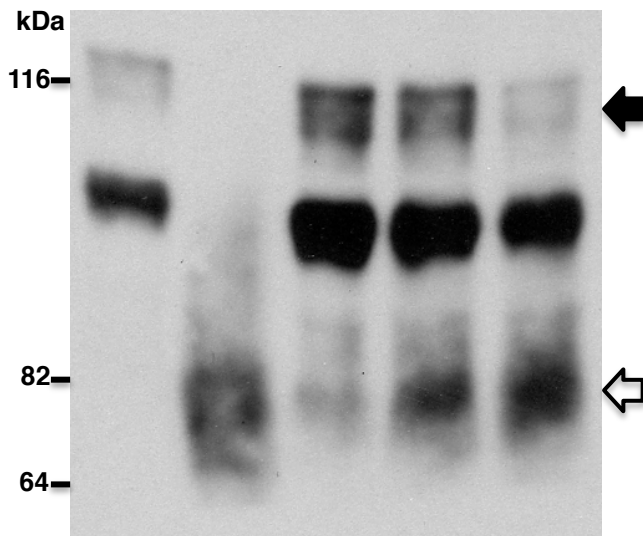

# Figure S2

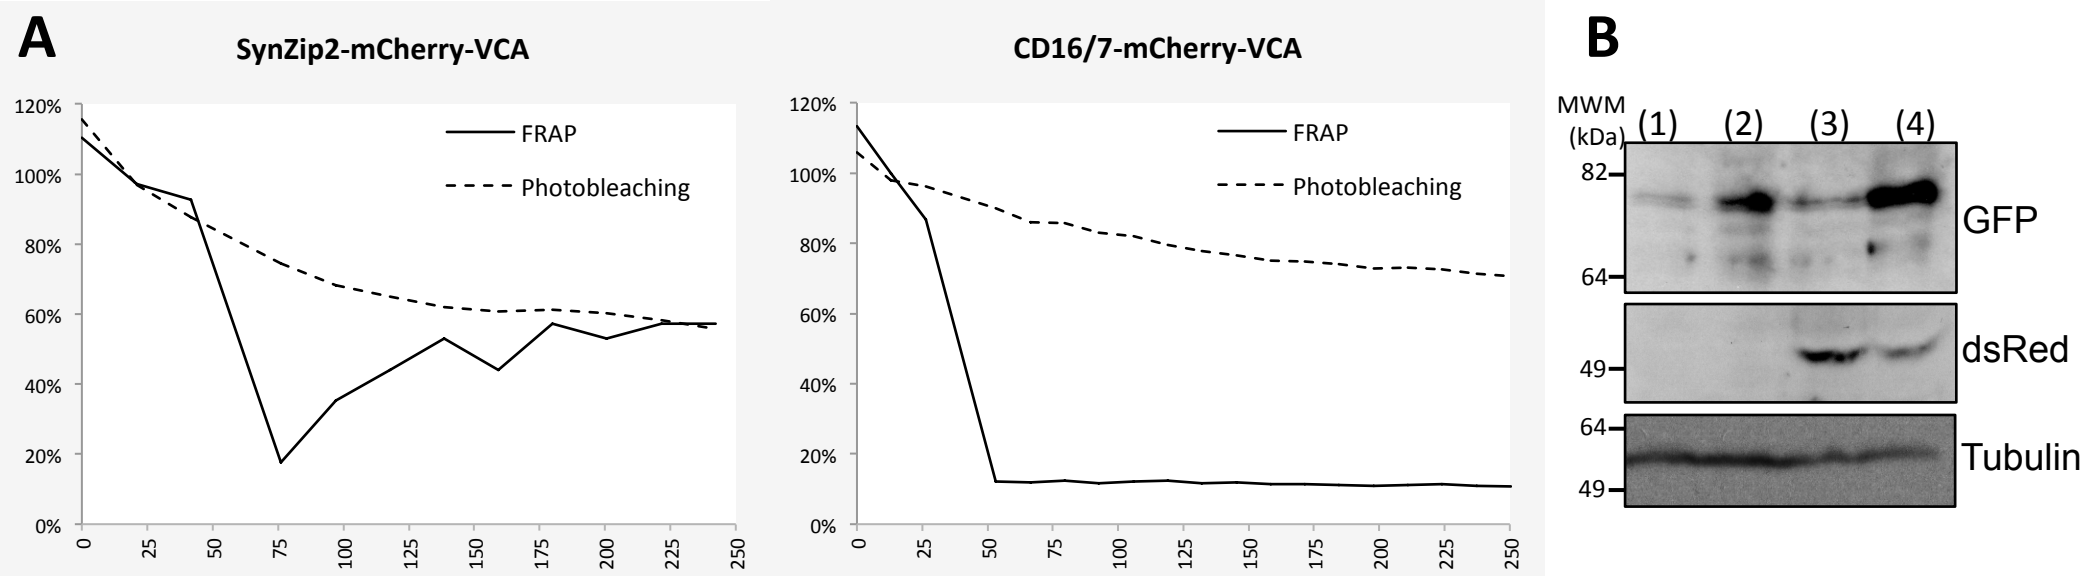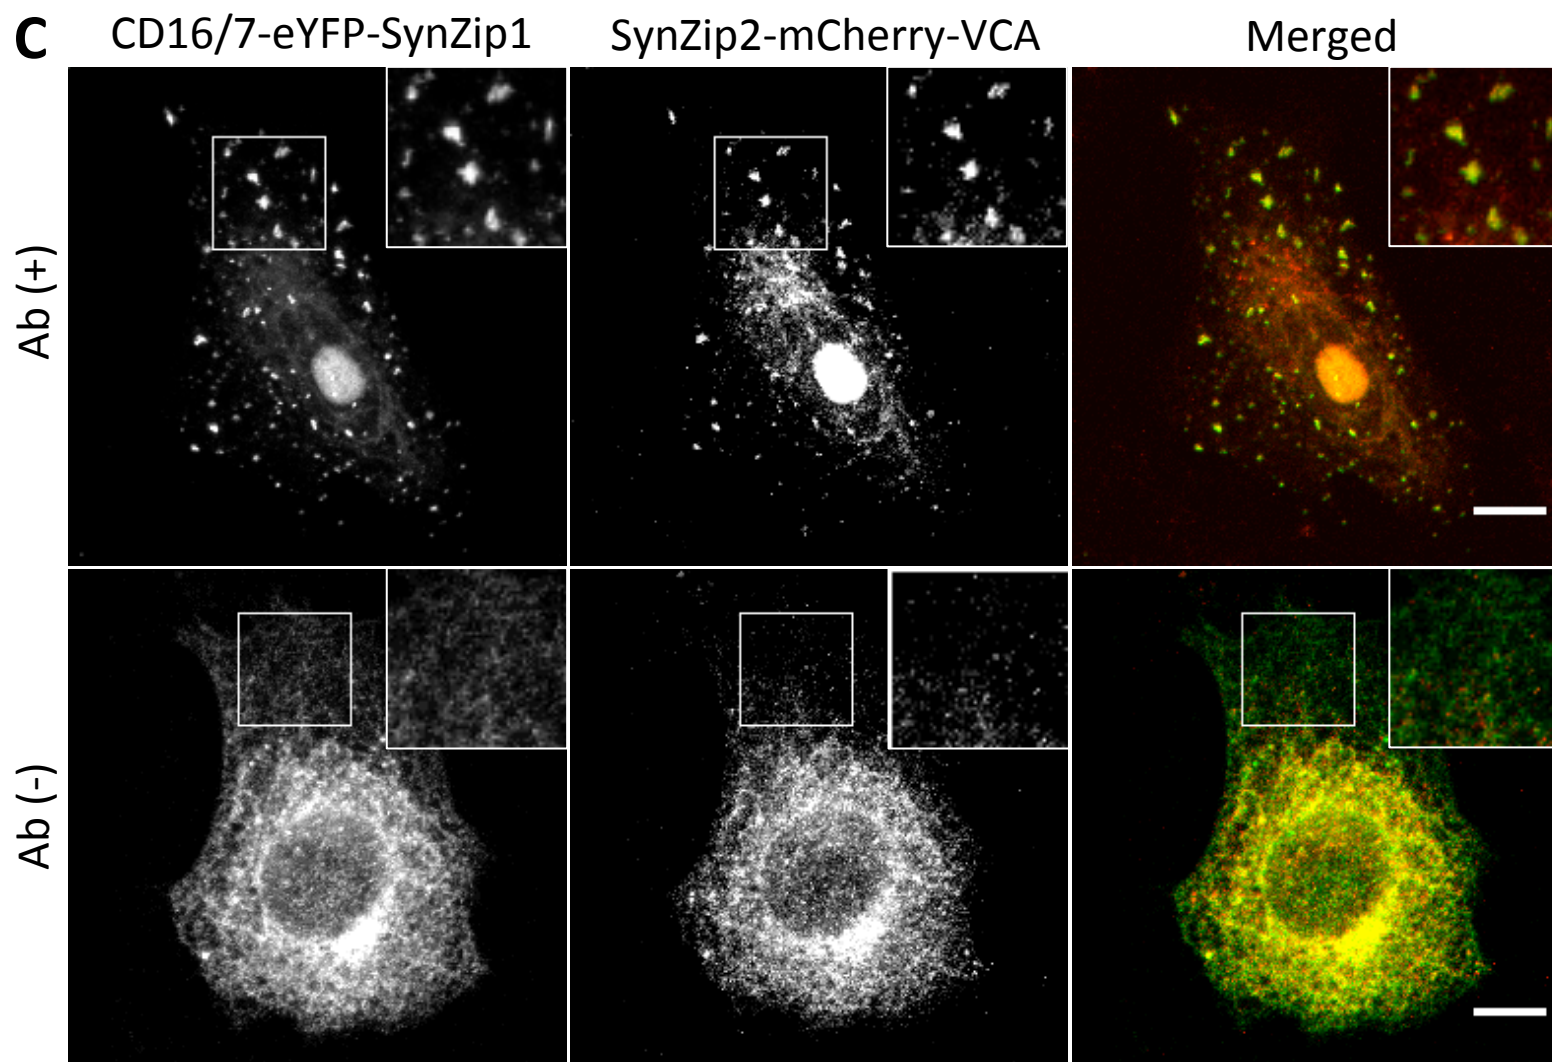

# Figure S3

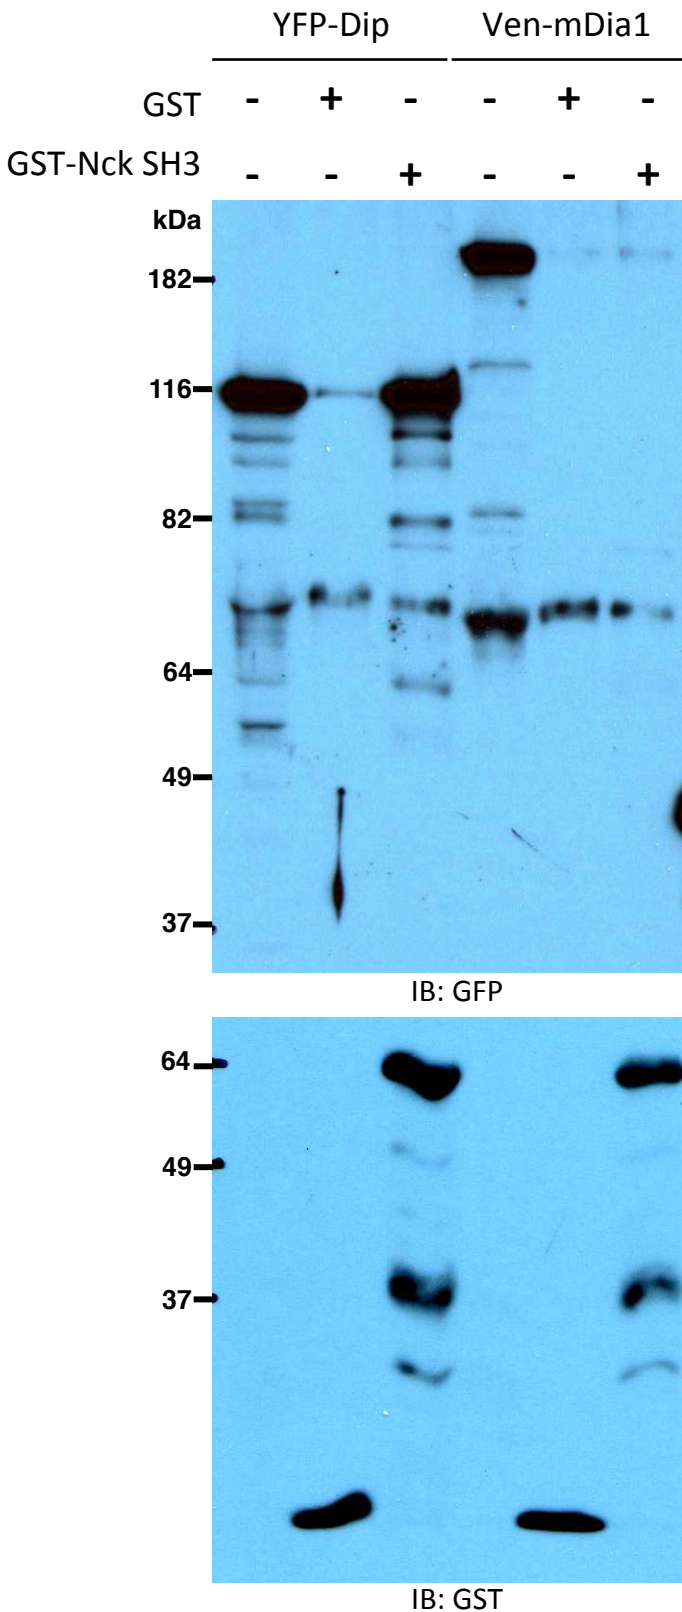

Figure S4

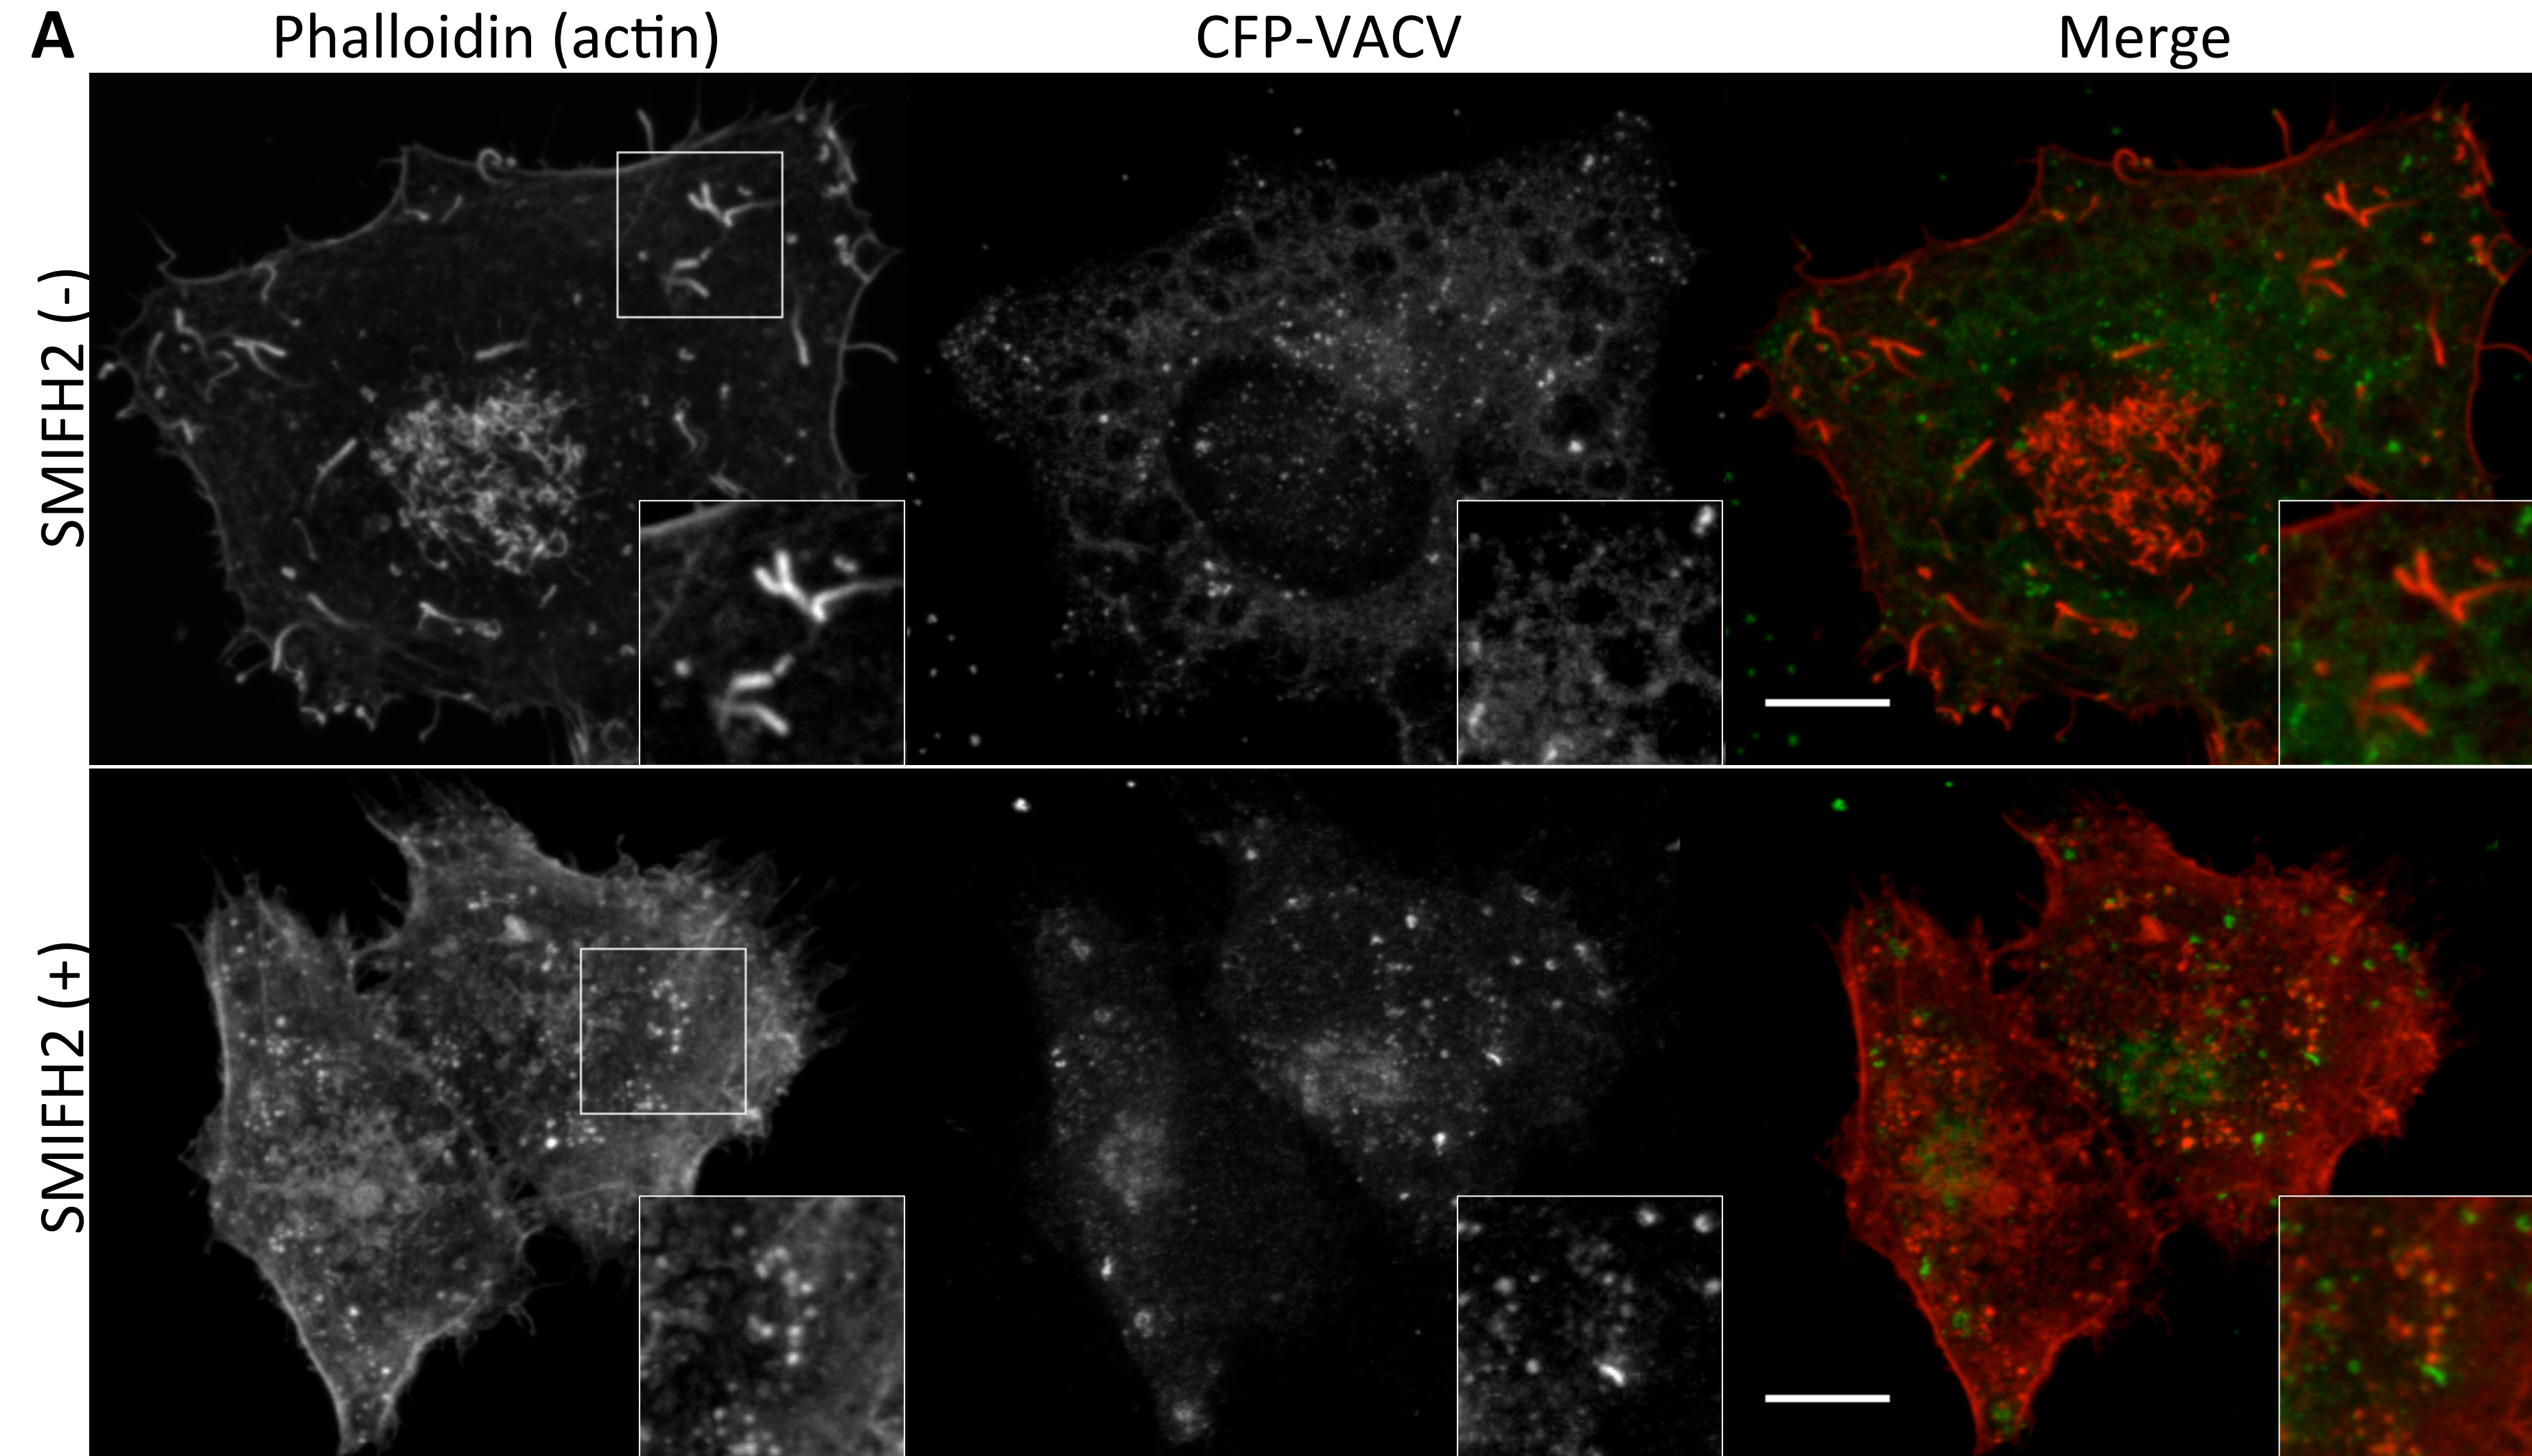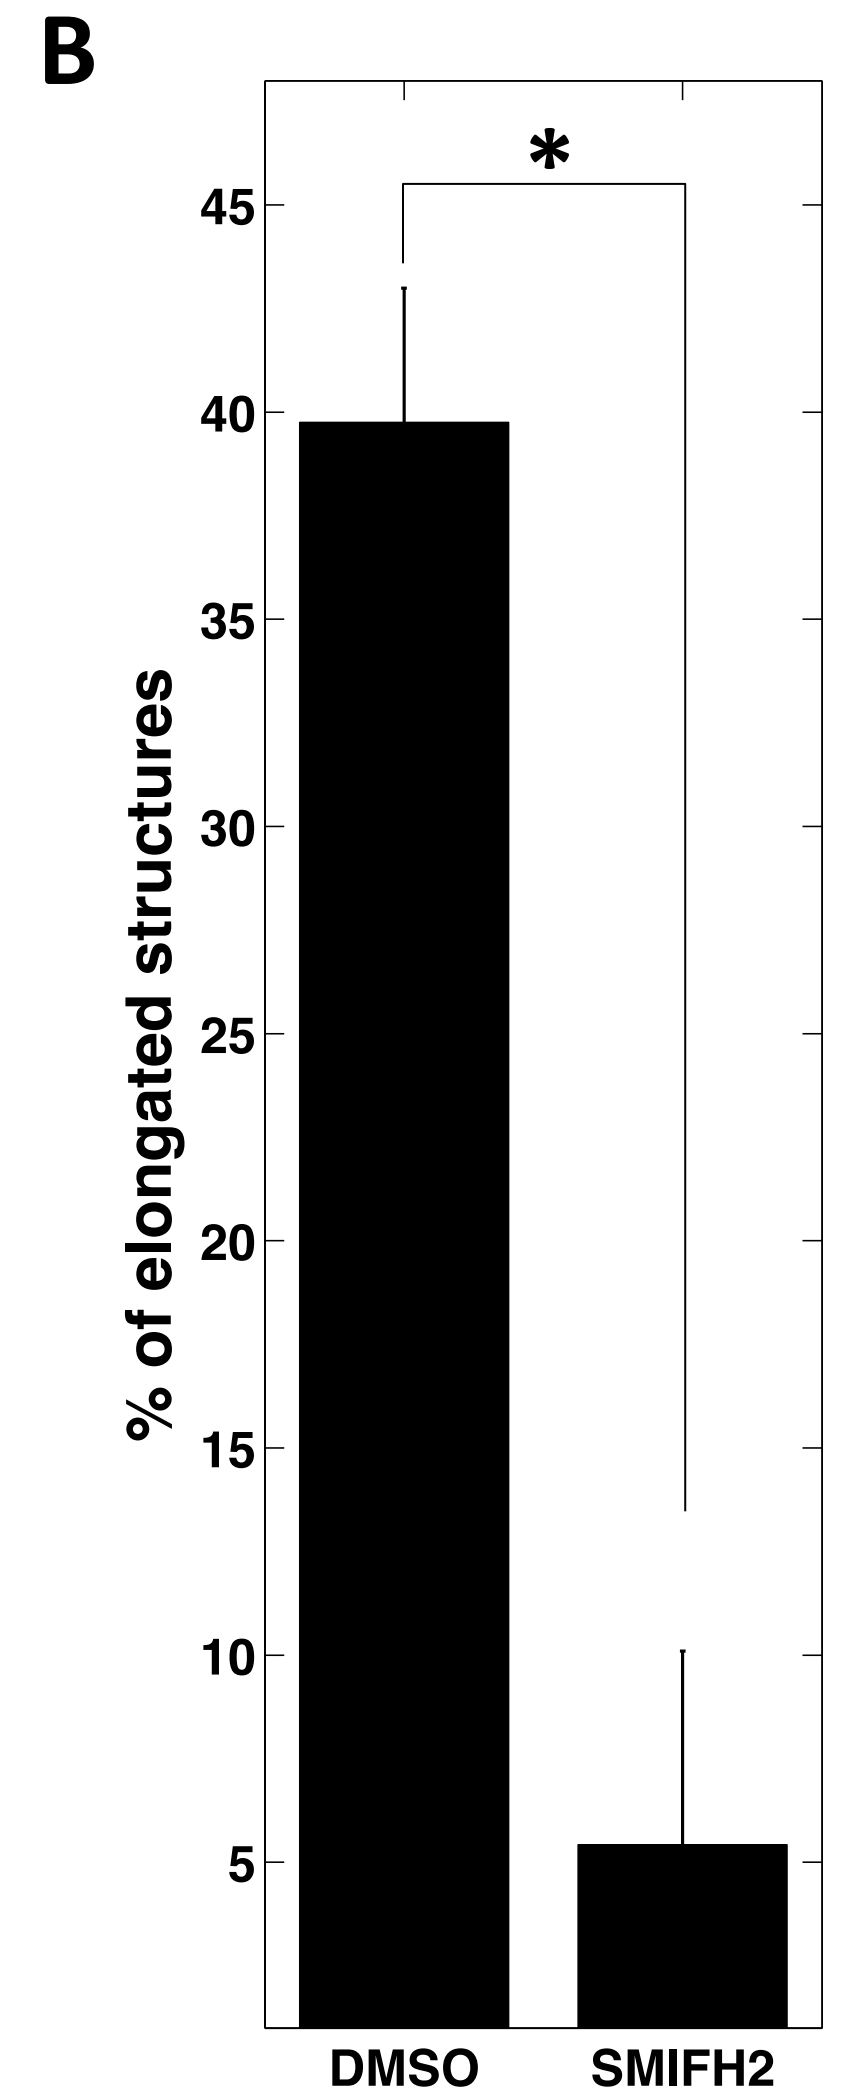

# Figure S5

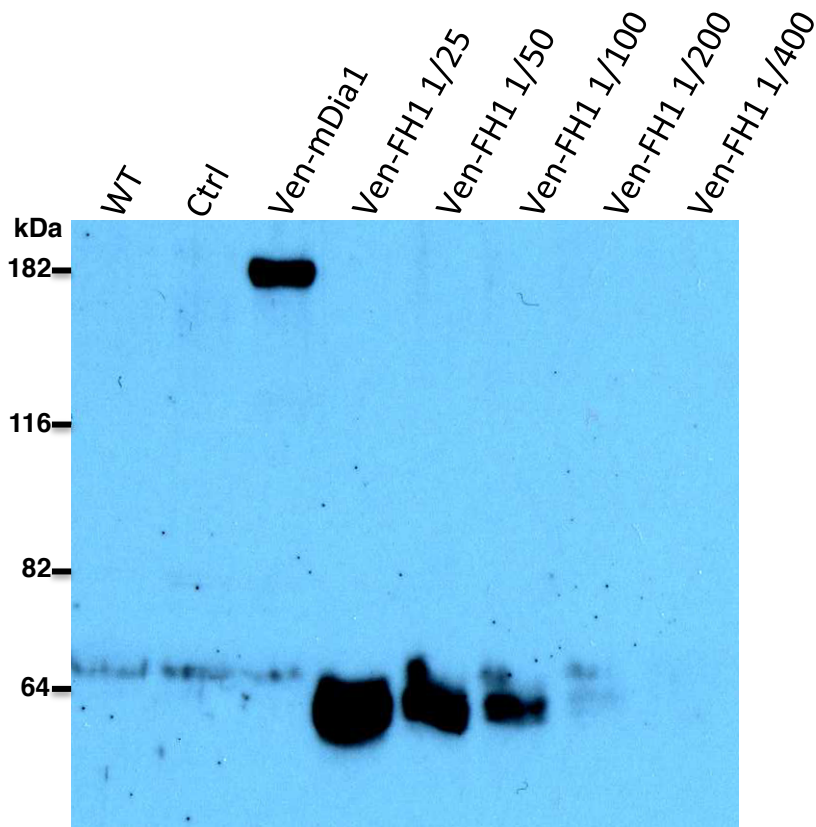

IB: GFP

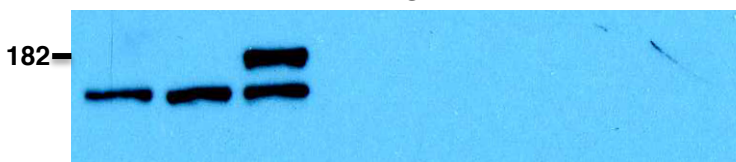

IB: mDia1

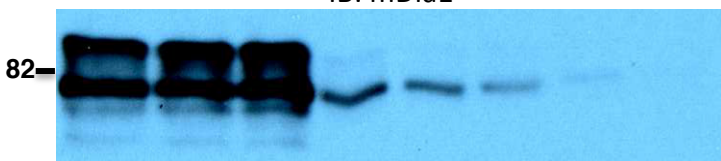

IB: Cortactin



# Figure S6

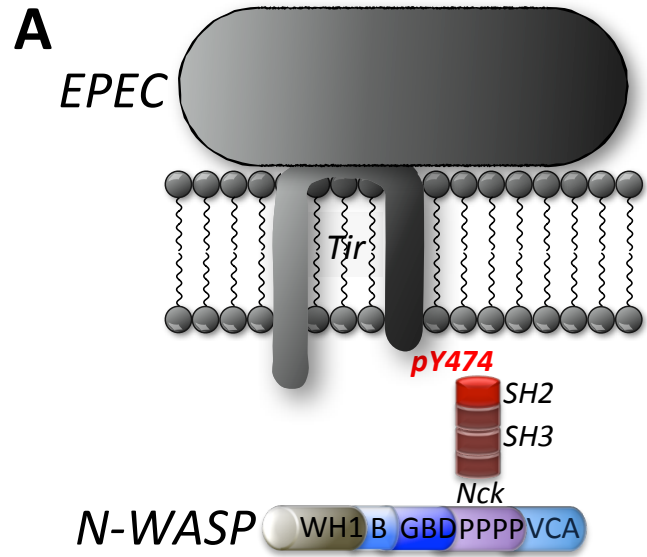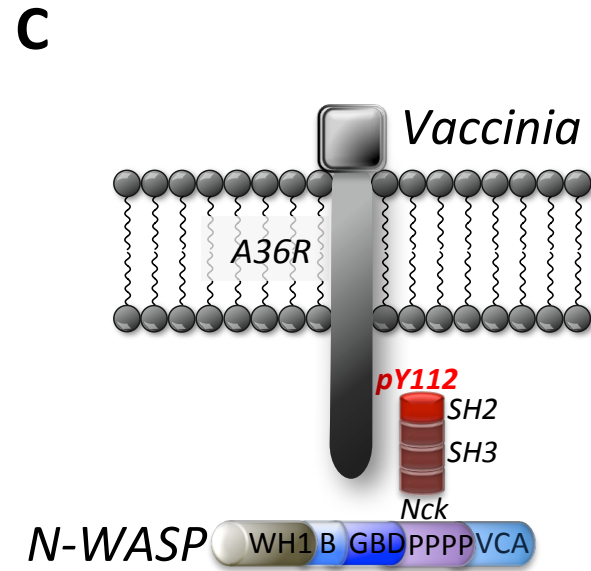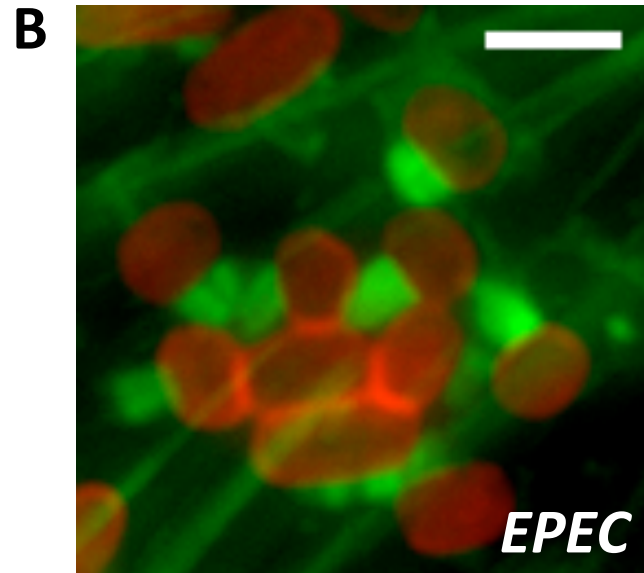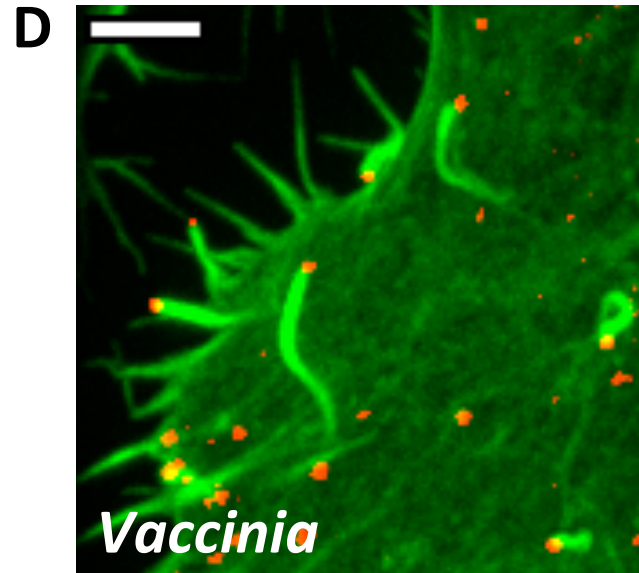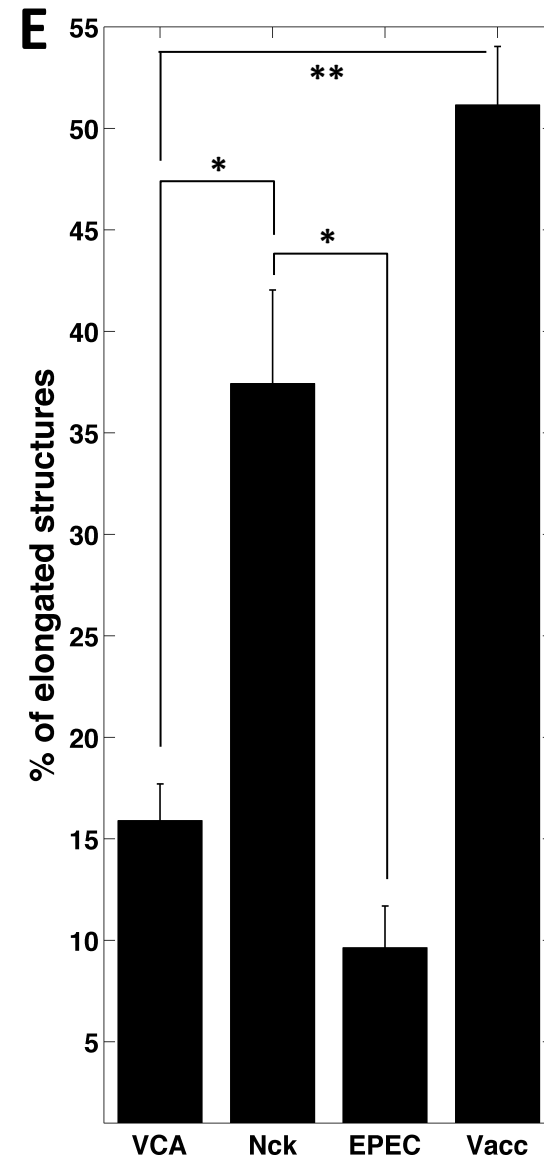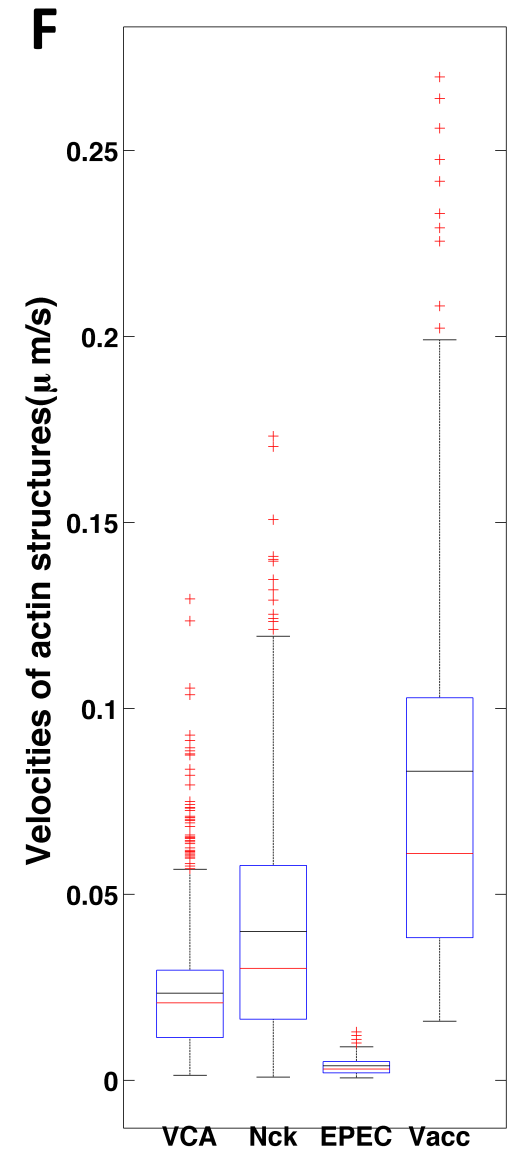

Supplement: supp_E14-11-1555v1_CombinedSupMats.pdf [file supp_E14-11-1555v1_CombinedSupMats.pdf]
